# Supplementary material for: Lin28a promotes self-renewal and proliferation of dairy goat spermatogonial stem cells (SSCs) through regulation of mTOR and PI3K/AKT
Source: PubMed Central journal article supplement (PMC5150521; doi:10.1038/srep38805), 2016-12-12
Supplement: srep38805-s1.pdf [file srep38805-s1.pdf]

## **Supplementary Information**

### **Lin28a promotes self-renewal and proliferation of dairy goat spermatogonial stem cells (SSCs) through regulation of mTOR and PI3K/AKT**

Fanglin Ma<sup>1</sup>, Zhe Zhou<sup>1</sup>, Na Li<sup>1</sup>, Liming Zheng<sup>1</sup>, Chongyang Wu<sup>1</sup>, Bowen Niu<sup>1</sup> ,  
Furong Tang<sup>1</sup>, Xin He<sup>1</sup>, Guangpeng Li<sup>2\*</sup>, Jinlian Hua<sup>1\*</sup>

1. College of Veterinary Medicine, Shaanxi Centre of Stem Cells Engineering & Technology, Northwest A&F University, Yangling, Shaanxi, 712100 China
2. Key Laboratory for Mammalian Reproductive Biology and Biotechnology, Ministry of Education, Inner Mongolia University, Hohhot, 010021, China



**Table S1** The length comparison of Lin28a of CDS and amino acid

| Species              | Length of CDS | Length of amino acid | Homology (%) |
|----------------------|---------------|----------------------|--------------|
| <i>Capra hircus</i>  | 630           | 209                  | 100%         |
| <i>Bos taurus</i>    | 618           | 205                  | 95.61%       |
| <i>Gallus gallus</i> | 609           | 202                  | 75.24%       |
| <i>Homo sapiens</i>  | 630           | 209                  | 90.84%       |
| <i>Mus musculus</i>  | 630           | 209                  | 89.52%       |
| <i>Ovis aries</i>    | 630           | 209                  | 99.52%       |
| <i>Sus scrofa</i>    | 618           | 205                  | 92.38%       |

**Table S2** The primer sequences

| Gene name | Primer                           | Tm/°C | Size/bp |
|-----------|----------------------------------|-------|---------|
| Lin28a    | Forward: GGTTTCGGCTTCCTGTCCAT    | 58    | 126     |
|           | Reverse: CAACTGCCTCACCCCTCCTT    |       |         |
| Plzf      | Forward: CACCGCAACAGCCAGCACTAT   | 58    | 127     |
|           | Reverse: CAGCGTACAGCAGGTCATCCAG  |       |         |
| Gfra1     | Forward: GGACAGGCAGCAGGAAATA     | 58    | 200     |
|           | Reverse: GTCTCCTGTCCCAGTCAAA     |       |         |
| Sox2      | Forward: GGCGGCAACCAGAAGAACAG    | 58    | 109     |
|           | Reverse: GCATCTTGGGGTTCTCCTGG    |       |         |
| Oct4      | Forward: AAGCAGTGACTACTCCCAACG   | 58    | 155     |
|           | Reverse: GGAATGGGACCGAAGAGTA     |       |         |
| Pcna      | Forward: AGTGGAGA ACTTGGAAATGGAA | 58    | 154     |
|           | Reverse: GAGACAGTGGAGTGGCTTTTGT  |       |         |
| Gapdh     | Forward: CCACGCCATCACTGCCACCC    | 58    | 116     |
|           | Reverse: CAGCCTTGGCAGCGCCAGTA    |       |         |
